# Supplementary material
Source: publisher figshare collection journal article supplement (https://gsajournals.figshare.com/ndownloader/files/14831858)
Supplement: Supplementary file 1 [file 14831858]

## Sheet: Table_S2__Fixed_Exp__PopInf
Table S2
Mean and maximum number of alleles and intrinsic merit ranges for both the AO model and the DAA model and each scenario of the Fixed experiment for an effectively infinite population
						Number of Alleles						Intrinsic merit range						Overdominance
Scenario	Setting					DAA model		AO model		Rel. deviation AO to DAA		DAA model		AO model		Rel. deviation AO to DAA		DAA model	AO model	Rel. deviation AO to DAA
Number	Max. intr. merit	Min. intr. merit	Range intr. merit	Multiplier f	Num. alleles init.	Weighted mean	Maximum	Weighted mean	Maximum	Weighted mean	Maximum	Weighted mean	Maximum	Weighted mean	Maximum	Weighted mean	Maximum	Overdom. rel. (%)	Overdom. rel. (%)	Overdom. rel. (%)
1	0.1	0	0.1	2	50	9.6561	11	10	10	0.0356148	-0.0909091	0.0174	0.022	0.018	0.018	0.0344828	-0.181818	0.86653	0.871595	0.00584515
2	0.1	0	0.1	2	100	13.781	16	14	14	0.0158914	-0.125	0.0128	0.015	0.013	0.013	0.015625	-0.133333	0.881858	0.880562	-0.00146962
3	0.1	0	0.1	2	250	21.9815	24	22	22	0.000841617	-0.0833333	0.0084	0.0096	0.0084	0.0084	0	-0.125	0.888687	0.888124	-0.000633519
4	0.1	0	0.1	2	500	31.228	33	31	31	-0.00730114	-0.0606061	0.0061	0.0068	0.006	0.006	-0.0163934	-0.117647	0.892011	0.891757	-0.00028475
5	0.1	0	0.1	2	1000	44.4	46	44	44	-0.00900901	-0.0434783	0.0044	0.0046	0.0043	0.0043	-0.0227273	-0.0652174	0.894361	0.894243	-0.000131938
6	0.1	0	0.1	10	50	9.768	11	10	10	0.023751	-0.0909091	0.0175	0.02	0.018	0.018	0.0285714	-0.1	0.871461	0.871595	0.000153765
7	0.1	0	0.1	10	100	13.8672	15	14	14	0.00957655	-0.0666667	0.0129	0.014	0.013	0.013	0.00775194	-0.0714286	0.88087	0.880562	-0.000349654
8	0.1	0	0.1	10	250	22.01	23	22	22	-0.000454339	-0.0434783	0.0084	0.0088	0.0084	0.0084	0	-0.0454545	0.887948	0.888124	0.00019821
9	0.1	0	0.1	10	500	31.296	32	31	31	-0.00945808	-0.03125	0.0061	0.0064	0.006	0.006	-0.0163934	-0.0625	0.891803	0.891757	-5.15809e-05
10	0.1	0	0.1	10	1000	44.4	45	44	44	-0.00900901	-0.0222222	0.0043	0.0045	0.0043	0.0043	0	-0.0444444	0.894274	0.894243	-3.4665e-05
11	0.55	0.45	0.1	2	50	22.8461	27	23	23	0.00673638	-0.148148	0.0457	0.058	0.044	0.044	-0.0371991	-0.241379	0.452831	0.454479	0.00363933
12	0.55	0.45	0.1	2	100	32.5168	37	33	33	0.01486	-0.108108	0.0329	0.041	0.032	0.032	-0.0273556	-0.219512	0.454053	0.453342	-0.0015659
13	0.55	0.45	0.1	2	250	51.8515	56	52	52	0.00286395	-0.0714286	0.0212	0.0244	0.0204	0.0204	-0.0377358	-0.163934	0.452486	0.452212	-0.000605544
14	0.55	0.45	0.1	2	500	73.448	79	74	74	0.00751552	-0.0632911	0.015	0.017	0.0146	0.0146	-0.0266667	-0.141176	0.451741	0.4516	-0.000312126
15	0.55	0.45	0.1	2	1000	104.32	109	105	105	0.0065184	-0.0366972	0.0107	0.0115	0.0104	0.0104	-0.0280374	-0.0956522	0.451217	0.451149	-0.000150704
16	0.55	0.45	0.1	10	50	23.0781	26	23	23	-0.00338416	-0.115385	0.0445	0.05	0.044	0.044	-0.011236	-0.12	0.4542	0.454479	0.000614267
17	0.55	0.45	0.1	10	100	32.7907	36	33	33	0.00638291	-0.0833333	0.0321	0.036	0.032	0.032	-0.00311526	-0.111111	0.453484	0.453342	-0.000313131
18	0.55	0.45	0.1	10	250	52.047	55	52	52	-0.00090303	-0.0545455	0.0206	0.0228	0.0204	0.0204	-0.00970874	-0.105263	0.452271	0.452212	-0.000130453
19	0.55	0.45	0.1	10	500	73.782	76	74	74	0.00295465	-0.0263158	0.0147	0.0154	0.0146	0.0146	-0.00680272	-0.0519481	0.451577	0.4516	5.09326e-05
20	0.55	0.45	0.1	10	1000	104.64	107	105	105	0.00344037	-0.0186916	0.0105	0.0109	0.0104	0.0104	-0.00952381	-0.0458716	0.451129	0.451149	4.43332e-05
21	0.6	0.2	0.4	2	50	11.6636	15	12	12	0.0288419	-0.2	0.0901	0.136	0.088	0.088	-0.0233074	-0.352941	0.40443	0.410198	0.014262
22	0.6	0.2	0.4	2	100	16.703	20	17	17	0.0177812	-0.15	0.0661	0.092	0.064	0.064	-0.03177	-0.304348	0.410404	0.407896	-0.00611105
23	0.6	0.2	0.4	2	250	26.749	31	27	27	0.00938353	-0.129032	0.0433	0.0544	0.0416	0.0416	-0.039261	-0.235294	0.406447	0.405387	-0.00260797
24	0.6	0.2	0.4	2	500	38.038	42	38	38	-0.000999001	-0.0952381	0.0311	0.0368	0.0296	0.0296	-0.0482315	-0.195652	0.40449	0.403955	-0.00132265
25	0.6	0.2	0.4	2	1000	54.23	57	54	54	-0.00424119	-0.0526316	0.0222	0.0244	0.0212	0.0212	-0.045045	-0.131148	0.403117	0.402867	-0.000620167
26	0.6	0.2	0.4	10	50	11.8807	14	12	12	0.0100415	-0.142857	0.0876	0.112	0.088	0.088	0.00456621	-0.214286	0.407062	0.410198	0.00770399
27	0.6	0.2	0.4	10	100	16.9481	19	17	17	0.00306229	-0.105263	0.0643	0.076	0.064	0.064	-0.00466563	-0.157895	0.408423	0.407896	-0.00129033
28	0.6	0.2	0.4	10	250	27.001	29	27	27	-3.70357e-05	-0.0689655	0.042	0.048	0.0416	0.0416	-0.00952381	-0.133333	0.405603	0.405387	-0.00053254
29	0.6	0.2	0.4	10	500	38.31	41	38	38	-0.00809188	-0.0731707	0.0301	0.0328	0.0296	0.0296	-0.0166113	-0.097561	0.404074	0.403955	-0.000294501
30	0.6	0.2	0.4	10	1000	54.37	56	54	54	-0.00680522	-0.0357143	0.0216	0.0232	0.0212	0.0212	-0.0185185	-0.0862069	0.40292	0.402867	-0.00013154
31	0.7	0.3	0.4	2	50	12.5936	16	13	13	0.0322704	-0.1875	0.099	0.152	0.096	0.096	-0.030303	-0.368421	0.31047	0.315103	0.0149225
32	0.7	0.3	0.4	2	100	18.0194	23	18	18	-0.00107662	-0.217391	0.0725	0.104	0.068	0.068	-0.062069	-0.346154	0.313425	0.311428	-0.00637154
33	0.7	0.3	0.4	2	250	28.891	33	29	29	0.0037728	-0.121212	0.0473	0.0576	0.0448	0.0448	-0.0528541	-0.222222	0.308439	0.307648	-0.00256453
34	0.7	0.3	0.4	2	500	41.192	44	42	42	0.0196155	-0.0454545	0.0339	0.0392	0.0328	0.0328	-0.0324484	-0.163265	0.305677	0.30557	-0.000350043
35	0.7	0.3	0.4	2	1000	58.46	62	59	59	0.00923709	-0.0483871	0.0241	0.0268	0.0232	0.0232	-0.0373444	-0.134328	0.304022	0.304019	-9.86771e-06
36	0.7	0.3	0.4	10	50	12.8626	15	13	13	0.0106821	-0.133333	0.0959	0.12	0.096	0.096	0.00104275	-0.2	0.313894	0.315103	0.00385162
37	0.7	0.3	0.4	10	100	18.3254	21	18	18	-0.0177568	-0.142857	0.0701	0.084	0.068	0.068	-0.0299572	-0.190476	0.311822	0.311428	-0.00126354
38	0.7	0.3	0.4	10	250	29.186	32	29	29	-0.00637292	-0.09375	0.0456	0.0512	0.0448	0.0448	-0.0175439	-0.125	0.307011	0.307648	0.00207484
39	0.7	0.3	0.4	10	500	41.408	44	42	42	0.0142968	-0.0454545	0.0327	0.0352	0.0328	0.0328	0.0030581	-0.0681818	0.305367	0.30557	0.000664774
40	0.7	0.3	0.4	10	1000	58.83	61	59	59	0.00288968	-0.0327869	0.0234	0.0252	0.0232	0.0232	-0.00854701	-0.0793651	0.303936	0.304019	0.000273084
41	0.8	0.4	0.4	2	50	13.4472	18	14	14	0.0411089	-0.222222	0.1081	0.168	0.104	0.104	-0.0379278	-0.380952	0.216128	0.218719	0.0119883
42	0.8	0.4	0.4	2	100	19.2865	25	20	20	0.0369948	-0.2	0.0788	0.116	0.076	0.076	-0.035533	-0.344828	0.215596	0.214107	-0.00690644
43	0.8	0.4	0.4	2	250	30.9115	35	31	31	0.00286301	-0.114286	0.0512	0.0656	0.048	0.048	-0.0625	-0.268293	0.210048	0.209459	-0.00280412
44	0.8	0.4	0.4	2	500	43.854	49	44	44	0.00332923	-0.102041	0.0363	0.0448	0.0344	0.0344	-0.0523416	-0.232143	0.206938	0.206897	-0.000198127
45	0.8	0.4	0.4	2	1000	62.64	67	63	63	0.00574713	-0.0597015	0.026	0.03	0.0248	0.0248	-0.0461538	-0.173333	0.205124	0.204986	-0.000672764
46	0.8	0.4	0.4	10	50	13.769	17	14	14	0.0167768	-0.176471	0.1037	0.128	0.104	0.104	0.00289296	-0.1875	0.216848	0.218719	0.00862816
47	0.8	0.4	0.4	10	100	19.6081	23	20	20	0.0199866	-0.130435	0.0755	0.092	0.076	0.076	0.00662252	-0.173913	0.214411	0.214107	-0.00141784
48	0.8	0.4	0.4	10	250	31.189	34	31	31	-0.00605983	-0.0882353	0.049	0.056	0.048	0.048	-0.0204082	-0.142857	0.209574	0.209459	-0.000548732
49	0.8	0.4	0.4	10	500	44.33	47	44	44	-0.00744417	-0.0638298	0.0352	0.0384	0.0344	0.0344	-0.0227273	-0.104167	0.207027	0.206897	-0.000627937
50	0.8	0.4	0.4	10	1000	62.71	65	63	63	0.00462446	-0.0307692	0.0251	0.0272	0.0248	0.0248	-0.0119522	-0.0882353	0.204986	0.204986	0
51	0.9	0.1	0.8	2	50	9.8561	14	10	10	0.0146001	-0.285714	0.1621	0.288	0.144	0.144	-0.111659	-0.5	0.117179	0.121707	0.0386417
52	0.9	0.1	0.8	2	100	14.2076	19	15	15	0.055773	-0.210526	0.1186	0.184	0.112	0.112	-0.0556492	-0.391304	0.122045	0.120079	-0.0161088
53	0.9	0.1	0.8	2	250	22.8935	28	23	23	0.00465198	-0.178571	0.0771	0.1056	0.0704	0.0704	-0.0869001	-0.333333	0.113993	0.113254	-0.00648285
54	0.9	0.1	0.8	2	500	32.584	36	33	33	0.012767	-0.0833333	0.0549	0.0672	0.0512	0.0512	-0.0673953	-0.238095	0.110879	0.110527	-0.00317463
55	0.9	0.1	0.8	2	1000	46.68	50	47	47	0.00685518	-0.06	0.0391	0.0448	0.0368	0.0368	-0.0588235	-0.178571	0.107958	0.10778	-0.00164879
56	0.9	0.1	0.8	10	50	10.2531	13	10	10	-0.0246852	-0.230769	0.1516	0.208	0.144	0.144	-0.0501319	-0.307692	0.123911	0.124969	0.00853839
57	0.9	0.1	0.8	10	100	14.6103	17	15	15	0.026673	-0.117647	0.1113	0.144	0.112	0.112	0.00628931	-0.222222	0.120469	0.120079	-0.00323735
58	0.9	0.1	0.8	10	250	23.293	26	23	23	-0.0125789	-0.115385	0.0728	0.0896	0.0704	0.0704	-0.032967	-0.214286	0.114054	0.113895	-0.00139408
59	0.9	0.1	0.8	10	500	33.064	36	33	33	-0.00193564	-0.0833333	0.0524	0.0608	0.0512	0.0512	-0.0229008	-0.157895	0.110608	0.110527	-0.000732316
60	0.9	0.1	0.8	10	1000	47.18	49	47	47	-0.00381518	-0.0408163	0.0377	0.0416	0.0368	0.0368	-0.0238727	-0.115385	0.107809	0.10778	-0.000268994
61	1	0	1	2	50	9.2599	14	10	10	0.0799253	-0.285714	0.228	0.52	0.18	0.18	-0.210526	-0.653846	0.012962	0.012603	-0.0276963
62	1	0	1	2	100	13.4147	19	14	14	0.0436312	-0.263158	0.169	0.35	0.13	0.13	-0.230769	-0.628571	0.007285	0.006879	-0.055731
63	1	0	1	2	250	21.6735	28	22	22	0.0150645	-0.214286	0.111	0.18	0.084	0.084	-0.243243	-0.533333	0.003175	0.003064	-0.0349606
64	1	0	1	2	500	31.16	38	31	31	-0.00513479	-0.184211	0.0787	0.112	0.06	0.06	-0.237611	-0.464286	0.001696	0.001653	-0.0253538
65	1	0	1	2	1000	44.38	49	44	44	-0.00856242	-0.102041	0.0557	0.071	0.043	0.043	-0.228007	-0.394366	0.000906	0.000889	-0.0187638
66	1	0	1	10	50	9.6503	15	10	10	0.0362372	-0.333333	0.1927	0.36	0.18	0.18	-0.0659056	-0.5	0.010831	0.012603	0.163604
67	1	0	1	10	100	13.7916	18	14	14	0.0151106	-0.222222	0.1437	0.22	0.13	0.13	-0.0953375	-0.409091	0.006969	0.006879	-0.0129143
68	1	0	1	10	250	21.983	27	22	22	0.000773325	-0.185185	0.0947	0.132	0.084	0.084	-0.112988	-0.363636	0.003089	0.003064	-0.00809323
69	1	0	1	10	500	31.312	36	31	31	-0.00996423	-0.138889	0.0679	0.084	0.06	0.06	-0.116348	-0.285714	0.001661	0.001653	-0.00481638
70	1	0	1	10	1000	44.13	48	44	44	-0.00294584	-0.0833333	0.0481	0.058	0.043	0.043	-0.106029	-0.258621	0.000892	0.000889	-0.00336323
71	1	0.9	0.1	2	50	31.1498	38	31	31	-0.00480902	-0.184211	0.0779	0.098	0.06	0.06	-0.229782	-0.387755	0.001689	0.001653	-0.0213144
72	1	0.9	0.1	2	100	44.2645	53	44	44	-0.00597544	-0.169811	0.0557	0.083	0.043	0.043	-0.228007	-0.481928	0.000906	0.000889	-0.0187638
73	1	0.9	0.1	2	250	70.3685	80	70	70	-0.00523672	-0.125	0.035	0.0468	0.0276	0.0276	-0.211429	-0.410256	0.000394	0.000389	-0.0126904
74	1	0.9	0.1	2	500	99.644	107	100	100	0.00357272	-0.0654206	0.0245	0.0304	0.0198	0.0198	-0.191837	-0.348684	0.000209	0.000208	-0.00478469
75	1	0.9	0.1	2	1000	141.71	150	141	141	-0.00501023	-0.06	0.017	0.0199	0.014	0.014	-0.176471	-0.296482	0.000112	0.00011	-0.0178571
76	1	0.9	0.1	10	50	31.2446	37	31	31	-0.00782855	-0.162162	0.068	0.096	0.06	0.06	-0.117647	-0.375	0.001619	0.001653	0.0210006
77	1	0.9	0.1	10	100	44.3743	51	44	44	-0.00843506	-0.137255	0.0484	0.064	0.043	0.043	-0.11157	-0.328125	0.000892	0.000889	-0.00336323
78	1	0.9	0.1	10	250	70.3555	76	70	70	-0.00505291	-0.0789474	0.0308	0.0368	0.0276	0.0276	-0.103896	-0.25	0.00039	0.000389	-0.0025641
79	1	0.9	0.1	10	500	99.54	107	100	100	0.00462126	-0.0654206	0.0216	0.0244	0.0198	0.0198	-0.0833333	-0.188525	0.000209	0.000208	-0.00478469
80	1	0.9	0.1	10	1000	140.95	146	141	141	0.000354736	-0.0342466	0.0153	0.0167	0.014	0.014	-0.0849673	-0.161677	0.00011	0.00011	0
					Mean	38.0012	41.8	38.1	38.1	0.00675614	-0.114922	0.0554913	0.0791513	0.0510825	0.0510825	-0.0579443	-0.231546	0.297843	0.298023	-0.000585527
					Max.	141.71	150	141	141	0.0799253	-0.0186916	0.228	0.52	0.18	0.18	0.0344828	-0.0444444	0.894361	0.894243	0.163604
					Min.	9.2599	11	10	10	-0.0246852	-0.333333	0.0043	0.0045	0.0043	0.0043	-0.243243	-0.653846	0.00011	0.00011	-0.055731
